# Supplementary material
Source: publisher figshare collection journal article supplement (https://sage.figshare.com/ndownloader/files/23063393)
Supplement: Supplementary file 1 [file 23063393]

## APPENDIX

### Appendix 1:

**Table 1: Multivariable model for AKI with predictors ranked in order of variation explained <sup>a</sup>**

| Characteristic                            | N = 16,362             | P-value |
|-------------------------------------------|------------------------|---------|
| Adjusted $\beta$ (95% CI)                 |                        |         |
| Age, per 5 years                          | 0.012 (0.008, 0.016)   | < 0.001 |
| Diabetes                                  | 0.048 (0.035, 0.061)   | < 0.001 |
| <u>IABP</u>                               |                        |         |
| None                                      | Ref                    |         |
| Preoperative                              | 0.074 (-0.017, 0.165)  | 0.097   |
| During CPB / Post-CPB / Postoperative     | 0.238 (0.072, 0.403)   | 0.011   |
| Hb preoperative <100g/L                   | 0.086 (0.057, 0.115)   | < 0.001 |
| CPB time, per 10 minutes                  | 0.004 (0.002, 0.006)   | 0.001   |
| Infective endocarditis                    | 0.093 (0.019, 0.167)   | 0.020   |
| <u>Procedure type</u>                     |                        |         |
| CABG only                                 | Ref                    |         |
| CABG + valvular surgery                   | 0.030 (0.013, 0.046)   | 0.003   |
| Valvular surgery only                     | 0.021 (0.004, 0.038)   | 0.021   |
| Hb <70g/L during CBP                      | 0.028 (-0.002, 0.059)  | 0.068   |
| Sex                                       | -0.015 (-0.036, 0.007) | 0.151   |
| Dialysis post-operatively                 | -0.048 (-0.193, 0.098) | 0.470   |
| Urgent, emergency or salvage operation    | 0.015 (-0.010, 0.039)  | 0.207   |
| Severe neurological disease               | 0.049 (0.028, 0.070)   | 0.001   |
| Peripheral vascular disease               | 0.016 (-0.004, 0.036)  | 0.099   |
| <u>Left ventricular ejection fraction</u> |                        |         |
| Normal (>60%)                             | Ref                    |         |
| Mild (46-60%)                             | 0.009 (-0.019, 0.036)  | 0.491   |
| Moderate (30-45%)                         | 0.012 (-0.015, 0.039)  | 0.341   |
| Severe (<30%)                             | 0.006 (-0.030, 0.042)  | 0.708   |
| Critical pre-operative state              | 0.044 (-0.014, 0.103)  | 0.119   |
| Cardiogenic shock at time of procedure    | 0.013 (-0.067, 0.093)  | 0.711   |
| Congestive heart failure                  | -0.010 (-0.028, 0.008) | 0.233   |

|                                                  |                        |       |
|--------------------------------------------------|------------------------|-------|
| Previous cardiac surgery                         | -0.004 (-0.018, 0.010) | 0.547 |
| Time spent at low flow < 1.6L/min/m <sup>2</sup> | 0.000 (-0.007, 0.007)  | 0.944 |

IABP: intra-aortic balloon pump; CPB: cardiopulmonary bypass; Hb: Haemoglobin; CABG: coronary artery bypass graft.

a 1. Outcome variable is log (post-op SCr/ pre-op SCr) with range [-3.3, 3.5]. 2. This is the model used to estimate the effect of time spent at low perfusion flow on AKI: therefore, predictors included are those that were found to be confounders of the association. Variables are listed in order of proportion of variation explained by that variable, not explained by the others. 3. Model has been weighted with propensity weights and model errors adjusted for clustering by hospital.

## Appendix 2:

### Full List of Acknowledgements

Flinders Cardiac Quality and Outcomes; Ms Bronwyn Kreig, Mr Chris Barratt, Ms Cynthia Edmonds,

ANZCPR Steering Committee; Prof Rob Baker (Chair), Prof Alan Merry, Prof Paul Myles, Mr Richard Newland, Mr Timothy Willcox.

The ANZCPR is not directly funded and is supported by the contributing interested individuals and their institutions:

The following individuals contributed to the ANZCPR as Investigators (I) and/or Data Managers (DM) at each site; Alfred Hospital; James Anderson (I), Robin McEgan (I), Mark Mennen (I), Jessica Underwood (I), Wendy Saad (I), Nicholas Carr (DM, I), Joshua Byrne (DM, I), Ashford Hospital; Jane Ottens (I), Andrew Sanderson (DM, I), Cabrini Private Hospital; James McMillan (I), Michael McDonald (DM, I), Smita Gavande (I), Kyriakos Angus-Anagnostou (I), Kamala Garfield (I), Vanessa Perafan (I), Emerson Sgammotta (I), Sreenivasulu Galaeti (I), Vijaykumar Valiyapurayil (I), Gil Giovinazzo (I), Adam Wells (I), Ravi Kapoor (I), Rowan Carpenter (I), Flinders Private Hospital; Kuljeet Farrar (DM, I), , Jane Ottens (I), Andrew Sanderson (I), Vijaykumar Valiyapurayil (I), Annette Mazzone (I), Flinders Medical Centre; Kuljeet Farrar (I), Roy Romanowicz (I), , Vijaykumar Valiyapurayil (I), Annette Mazzone (I), Auckland City Hospital; Misty Bean (DM, I), Jude Clark (I), Taryn Evans (I), Nathan Ibbott (I), Alan Merry (I), Kathrine Morris (I), Rachael van Uden (I), , Shuja Zahidani (I), Jill Chase (I), Luise van Wijk (I), Daryl Birchler (I), Alex Peterson (I), Danielle Blackie (I), Mark Greaves (I), Thomas Hick (I), James Holder (I), Hina Solanki (I), Ghaz Jabur (I), Cynthia Riddell (I), Camilla Hand (I), Kate Rawlings (I), Royal Hobart Hospital; Carmel Fenton (DM, I), Nick Carr (I), YiYi Huang (DM, I), Royal Perth Hospital; Samantha Bizzell (I), Stuart Prince (DM, I), Viji Vincent (I), Brian Wright (I), Westmead Hospital; Grace Agbulos (I), Orison Kim (I), Monique Brouwer (I), Rona Steel (DM, I), Ray Miraziz (I) Peter Klineberg (I).

Flinders Cardiac Quality and Outcomes; Ms Bronwyn Kreig, Mr Chris Barratt, Ms Cynthia Edmonds contributed to the management of the ANZCPR
